# Supplementary material for: Bimetallic Pt–Pd catalysts supported on TiO2 for enhanced photocatalytic N-alkylation of amines with alcohols: the synergistic effect
Source: Royal Society of Chemistry journal article supplement (doi:10.1039/d3cy00980g), 2023-01-01
Supplement: d3cy00980g1.pdf [file d3cy00980g1.pdf]

# Supporting Information

## Content

|                                                                                                                                                                                                                                                                                                        |            |
|--------------------------------------------------------------------------------------------------------------------------------------------------------------------------------------------------------------------------------------------------------------------------------------------------------|------------|
| <b>Experimental Section</b> .....                                                                                                                                                                                                                                                                      | <b>S2</b>  |
| <b>Figure S1. SEM image of (a) TiO<sub>2</sub> (b) Pd/TiO<sub>2</sub> and (c) Pt/TiO<sub>2</sub>.</b> .....                                                                                                                                                                                            | <b>S2</b>  |
| <b>Figure S2. BET surface area and Nitrogen sorption isotherms at 77 K for Pd<sub>1</sub>Pt<sub>1</sub>/TiO<sub>2</sub>.</b> .....                                                                                                                                                                     | <b>S3</b>  |
| <b>Figure S3. XRD diffraction patterns of other bimetallic photocatalysts.</b> .....                                                                                                                                                                                                                   | <b>S3</b>  |
| <b>Figure S4. (a) core level spectra of C1s of Pd<sub>1</sub>Pt<sub>1</sub>/TiO<sub>2</sub>. (b) XPS core level spectra of Pd 3d<sub>5/2</sub> and 3d<sub>3/2</sub> doublet region of Pd/TiO<sub>2</sub>. (c) Pt 4f<sub>7/2</sub> and 4f<sub>5/2</sub> doublet region of Pt/TiO<sub>2</sub>.</b> ..... | <b>S4</b>  |
| <b>Figure S5. VB-XPS plots of (a) Pd/TiO<sub>2</sub> (b) Pd<sub>1</sub>Pt<sub>1</sub>/TiO<sub>2</sub> (c) Pt/TiO<sub>2</sub>.</b> .....                                                                                                                                                                | <b>S5</b>  |
| <b>Table S1. valence band edge potential (E<sub>VB</sub>) and conductor band edge potential E<sub>CB</sub> of various catalysts.</b> .....                                                                                                                                                             | <b>S5</b>  |
| <b>Table S2. Benzaldehyde formed during photoreaction of benzyl alcohol with respective catalysts in the absence of amine.</b> .....                                                                                                                                                                   | <b>S5</b>  |
| <b>Table S3. The yields of secondary amine 2d obtained during hydrogenation of imine 1d in methanol with respective catalysts.</b> .....                                                                                                                                                               | <b>S6</b>  |
| <b>MS spectra of all products</b> .....                                                                                                                                                                                                                                                                | <b>S7</b>  |
| <b>NMR spectra of selected products</b> .....                                                                                                                                                                                                                                                          | <b>S11</b> |
| <b>Computational Section</b> .....                                                                                                                                                                                                                                                                     | <b>S24</b> |
| <b>Figure S6. Stick model for Pd, Pd<sub>1</sub>Pt<sub>1</sub> and Pt clusters</b> .....                                                                                                                                                                                                               | <b>S24</b> |
| <b>Computational Details</b> .....                                                                                                                                                                                                                                                                     | <b>S24</b> |
| <b>References</b> .....                                                                                                                                                                                                                                                                                | <b>S24</b> |

## Experimental Section

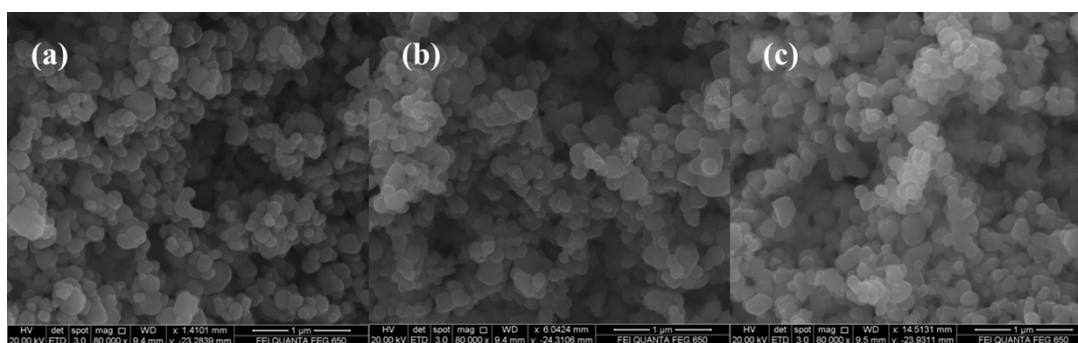

**Figure S1. SEM image of (a) TiO<sub>2</sub> (b) Pd/TiO<sub>2</sub> and (c) Pt/TiO<sub>2</sub>.**

### Summary Report

#### Surface Area

Single point surface area at P/P<sub>0</sub> = 0.254951315: 11.0895 m<sup>2</sup>/g

BET Surface Area: 12.2337 m<sup>2</sup>/g

Langmuir Surface Area: 51.2332 m<sup>2</sup>/g

t-Plot Micropore Area: 1.0105 m<sup>2</sup>/g

t-Plot external surface area: 11.2232 m<sup>2</sup>/g

BJH Adsorption cumulative surface area of pores  
between 1.7000 nm and 300.0000 nm diameter: 12.8044 m<sup>2</sup>/g

BJH Desorption cumulative surface area of pores  
between 1.7000 nm and 300.0000 nm diameter: 12.1893 m<sup>2</sup>/g

#### Pore Volume

t-Plot micropore volume: 0.000138 cm<sup>3</sup>/g

BJH Adsorption cumulative volume of pores  
between 1.7000 nm and 300.0000 nm diameter: 0.047246 cm<sup>3</sup>/g

BJH Desorption cumulative volume of pores  
between 1.7000 nm and 300.0000 nm diameter: 0.046204 cm<sup>3</sup>/g

#### Pore Size

Adsorption average pore diameter (4V/A by BET): 15.2674 nm

Desorption average pore diameter (4V/A by BET): 5.8623 nm

BJH Adsorption average pore diameter (4V/A): 14.7593 nm

BJH Desorption average pore diameter (4V/A): 15.1620 nm

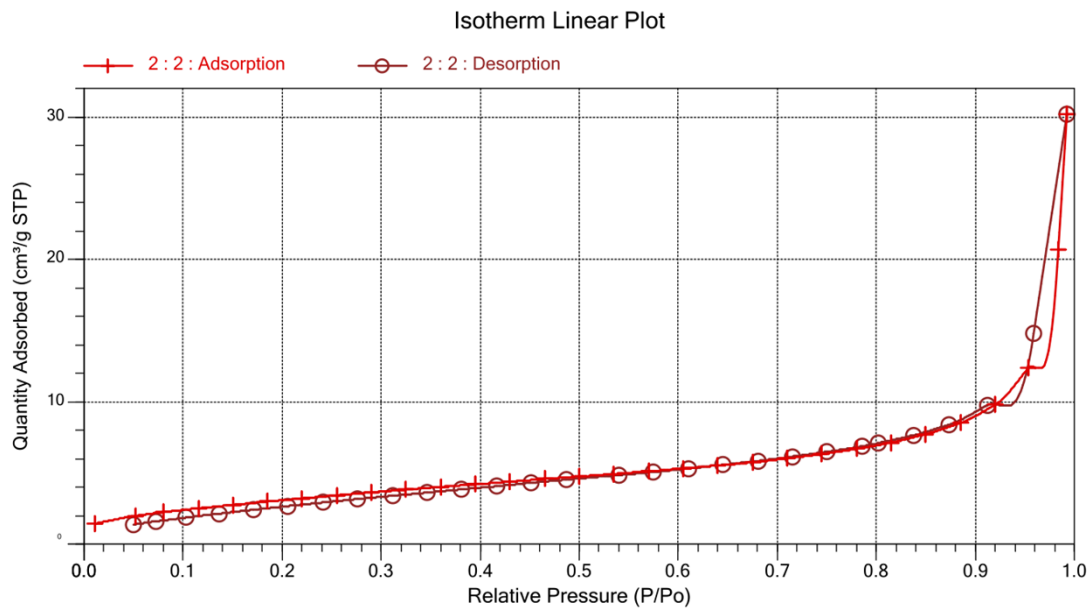

**Figure S2. BET surface area and Nitrogen sorption isotherms at 77 K for Pd<sub>1</sub>Pt<sub>1</sub>/TiO<sub>2</sub>**

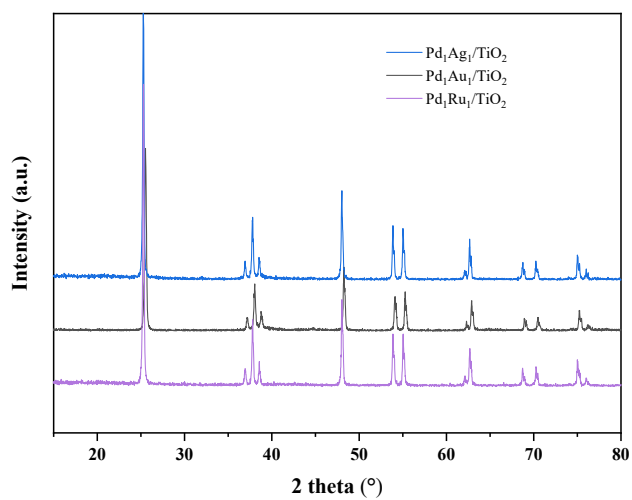

**Figure S3. XRD diffraction patterns of other bimetallic photocatalysts.**

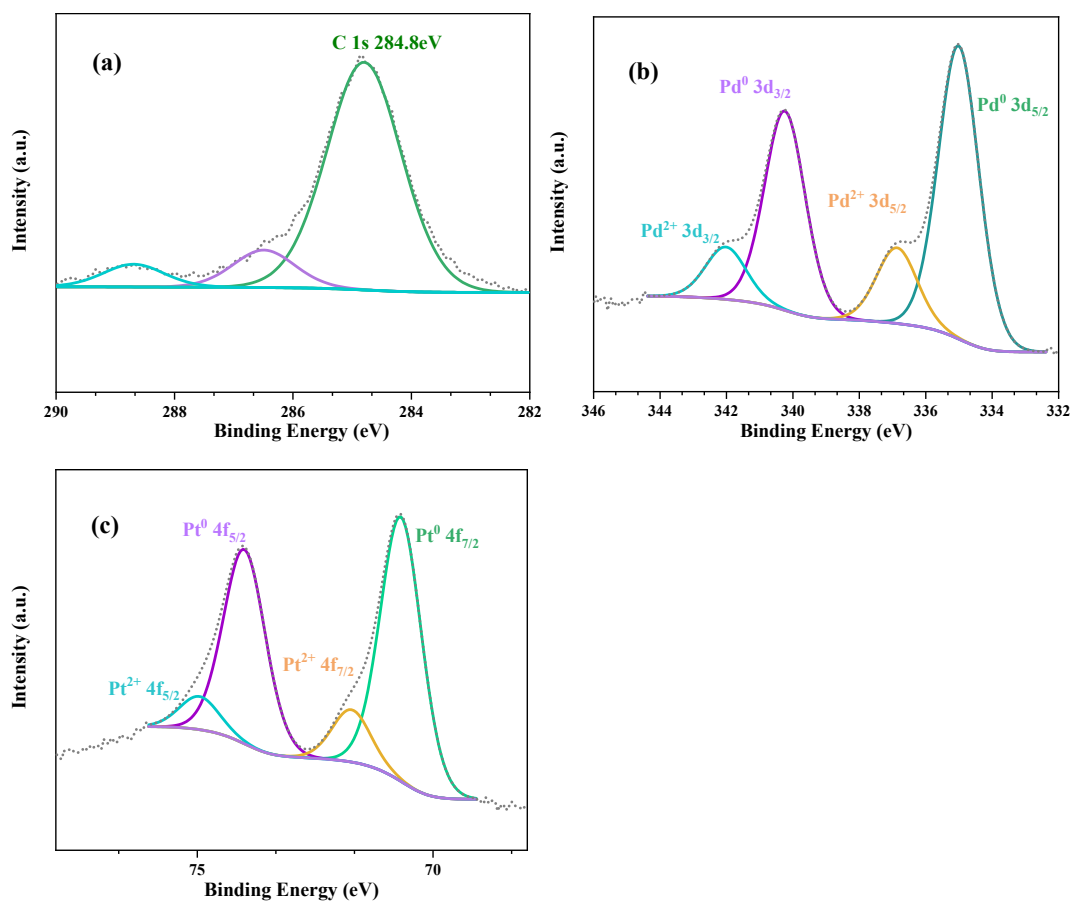

**Figure S4. (a) core level spectra of C1s of Pd<sub>1</sub>Pt<sub>1</sub>/TiO<sub>2</sub>. (b) XPS core level spectra of Pd 3d<sub>5/2</sub> and 3d<sub>3/2</sub> doublet region of Pd/TiO<sub>2</sub>. (c) Pt 4f<sub>7/2</sub> and 4f<sub>5/2</sub> doublet region of Pt/TiO<sub>2</sub>.**

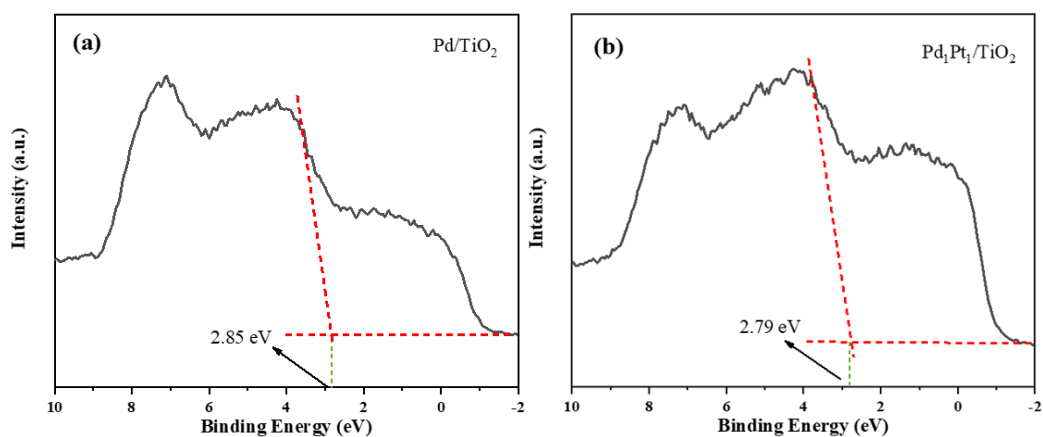

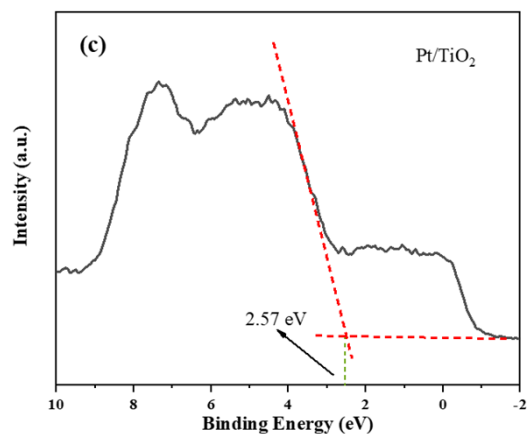

**Figure S5.** VB-XPS plots of (a) Pd/TiO<sub>2</sub> (b) Pd<sub>1</sub>Pt<sub>1</sub>/TiO<sub>2</sub> (c) Pt/TiO<sub>2</sub>.

the  $E_{VB}$  of the corresponding standard hydrogen electrode ( $E_{VB, NHE}$ ) can be calculated according to the following formula:  $E_{VB, NHE} = \varphi + E_{VB, XPS} - 4.44$ , where  $\varphi$  is the work function of the instrument (4.5 eV).<sup>1</sup>

**Table S1.** valence band edge potential ( $E_{VB}$ ) and conductor band edge potential  $E_{CB}$  of various catalysts.

| catalyst                                          | $E_{VB}$ (eV) | $E_{CB}$ (eV) | Band gap (eV) |
|---------------------------------------------------|---------------|---------------|---------------|
| TiO <sub>2</sub>                                  | 2.932         | -0.312        | 3.244         |
| Pd/TiO <sub>2</sub>                               | 2.906         | -0.286        | 3.191         |
| Pd <sub>2</sub> Pt <sub>1</sub> /TiO <sub>2</sub> | 2.905         | -0.285        | 3.189         |
| Pd <sub>1</sub> Pt <sub>1</sub> /TiO <sub>2</sub> | 2.891         | -0.271        | 3.161         |
| Pd <sub>1</sub> Pt <sub>2</sub> /TiO <sub>2</sub> | 2.891         | -0.271        | 3.161         |
| Pt/TiO <sub>2</sub>                               | 2.892         | -0.271        | 3.163         |

**Table S2.** Benzaldehyde formed during photoreaction of benzyl alcohol with respective catalysts in the absence of amine.

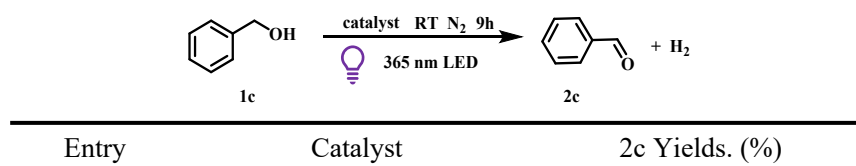

|   |                                                   |    |
|---|---------------------------------------------------|----|
| 1 | Pd/TiO <sub>2</sub>                               | 28 |
| 2 | Pd <sub>2</sub> Pt <sub>1</sub> /TiO <sub>2</sub> | 43 |
| 3 | Pd <sub>1</sub> Pt <sub>1</sub> /TiO <sub>2</sub> | 56 |
| 4 | Pd <sub>1</sub> Pt <sub>2</sub> /TiO <sub>2</sub> | 65 |
| 5 | Pt/TiO <sub>2</sub>                               | 71 |

Reaction conditions: benzyl alcohol (2.1 mmol), MeCN (5 ml), catalyst (10 mg), N<sub>2</sub>, r.t., light irradiation (365 nm LED, 18 mW/cm<sup>2</sup>), 9 h. The yields were obtained by HPLC.

**Table S3. The yields of secondary amine 2d obtained during hydrogenation of imine 1d in methanol with respective catalysts.**

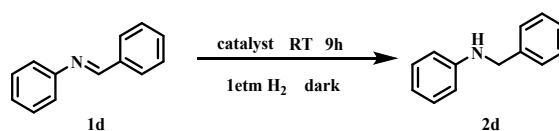

| Entry | Catalyst                                          | 2d Yields. (%) |
|-------|---------------------------------------------------|----------------|
| 1     | Pd/TiO <sub>2</sub>                               | 75             |
| 2     | Pd <sub>2</sub> Pt <sub>1</sub> /TiO <sub>2</sub> | 86             |
| 3     | Pd <sub>1</sub> Pt <sub>1</sub> /TiO <sub>2</sub> | 60             |
| 4     | Pd <sub>1</sub> Pt <sub>2</sub> /TiO <sub>2</sub> | 43             |
| 5     | Pt/TiO <sub>2</sub>                               | 10             |

Reaction conditions: N-Benzylideneaniline (2.1 mmol), methanol (5 ml), catalyst (10 mg), 1 atm H<sub>2</sub>, r.t., 9 h. The yields were obtained by HPLC.

### The details of product analysis and drawing of calibration curve

For aniline products, HPLC was used with calibration (C18 column, 30 °C, λ=254 nm, MeOH mobile phase, 1 mL min<sup>-1</sup>), and the calibration curve was drawn by measuring the peak area of 0.025, 0.05, 0.1, 0.2, 0.5 mg/ml of standard sample. The calibration curve is as follows, and the HPLC yields were calculated as following formula:

$$HPLC\ yield = \frac{c \times 75 \times 5}{1.4 \times M}$$

Where the “c” represents for concentration obtained from calibration curve, “75” represent for dilution factor; “5” represent for volume of reaction solution; “M” represents for molecular weight of the product. Other products were analyzed by GC-FID using area normalization method.

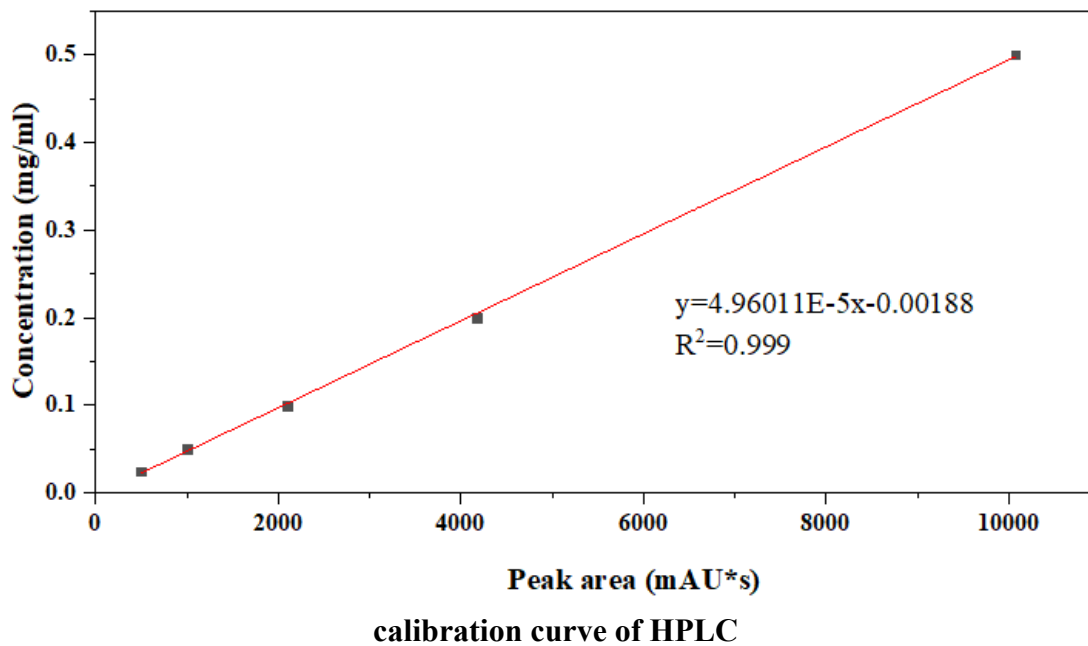

### MS spectra of all products

#### *N,N*-Dimethylaniline

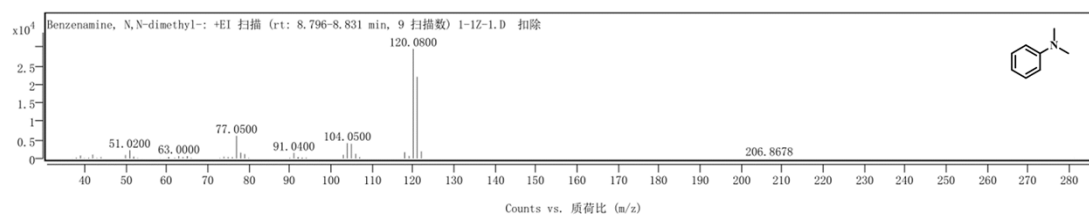

#### *N*-Benzyl-diethylamine

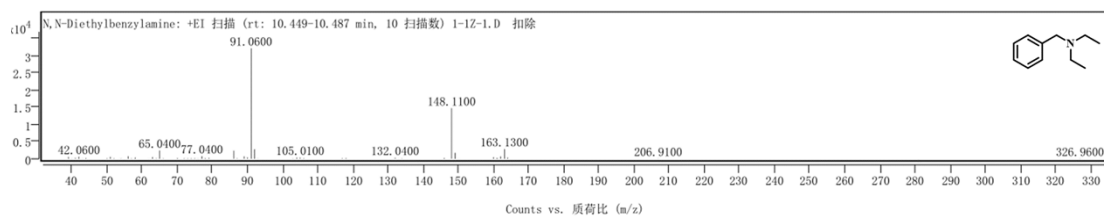

#### *N*-Benzylpropanamine

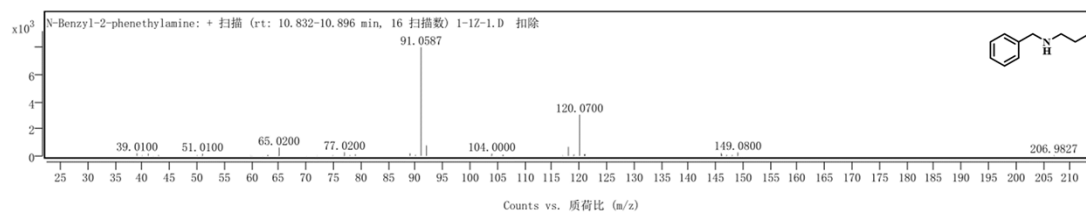

#### *N*-Butylaniline

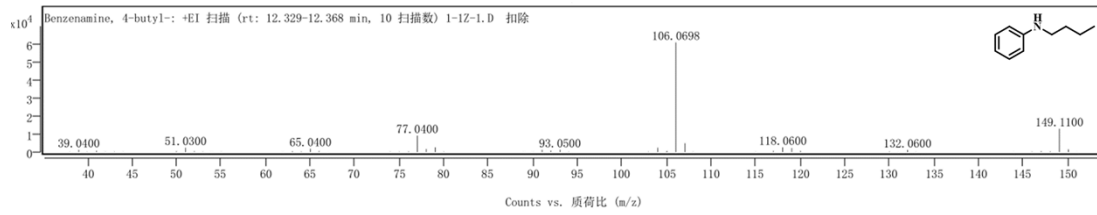

### N-Benzylaniline

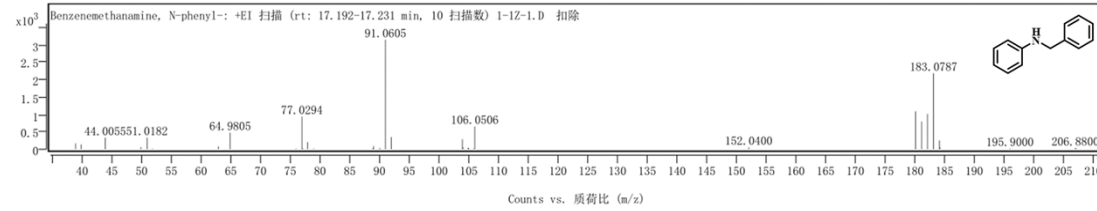

### Dibenzylamine

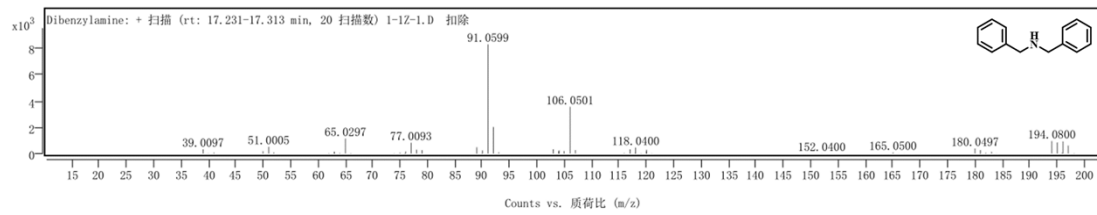

### Diisopropylamine

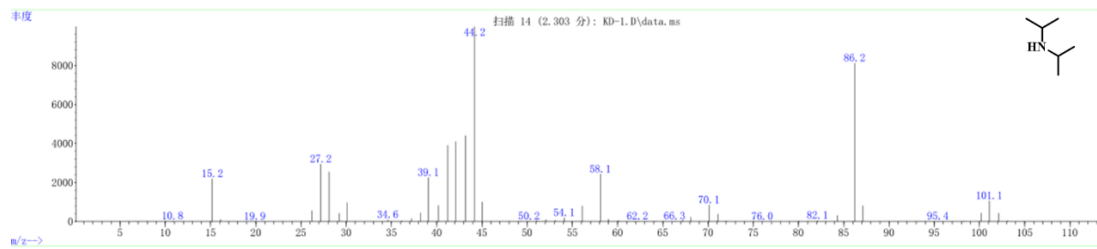

### 4-Methylmorpholine

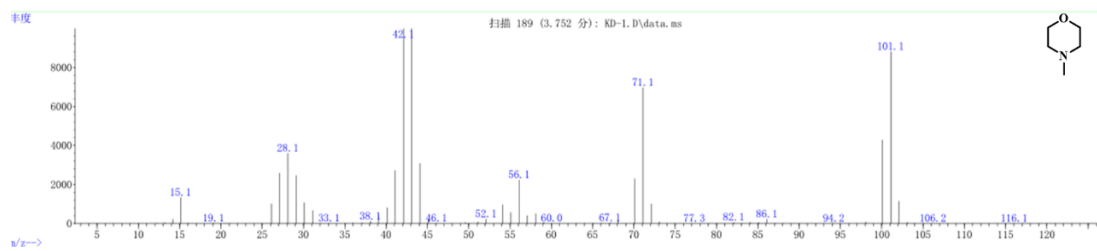

### N,N,N',N'-Tetramethylethylenediamine

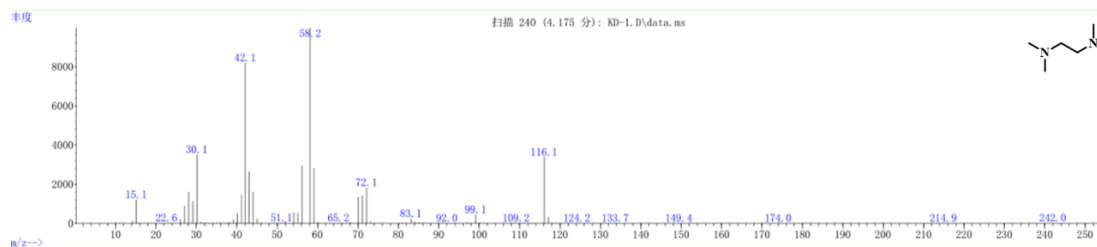

### 4-chloro-N,N-dimethylaniline



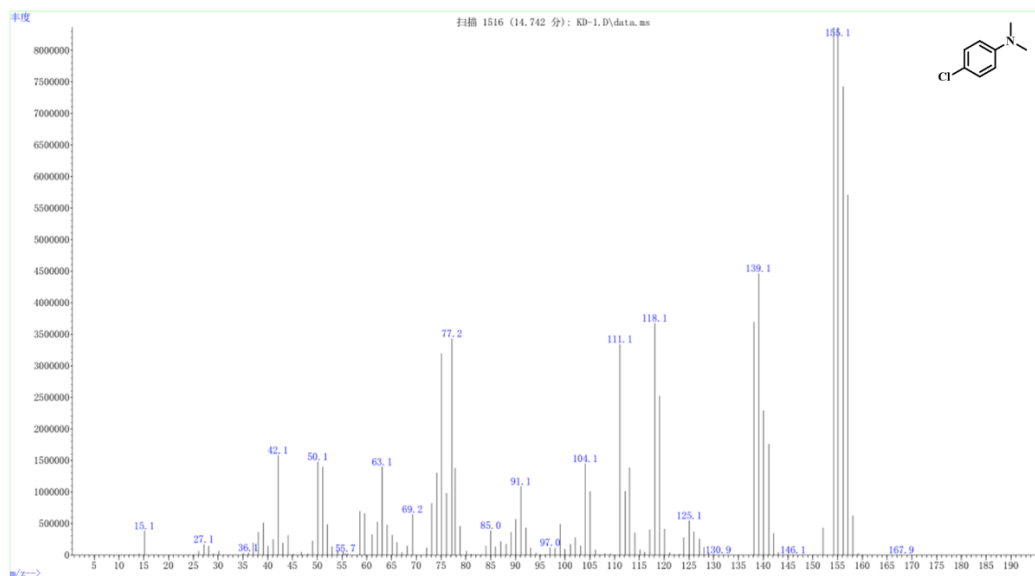

### N,N-Diisopropylethylamine

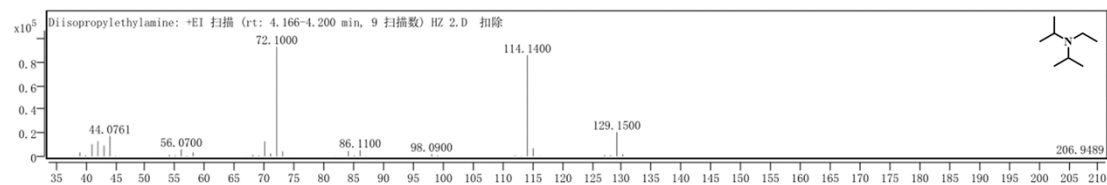

### 1-Ethylpiperidine

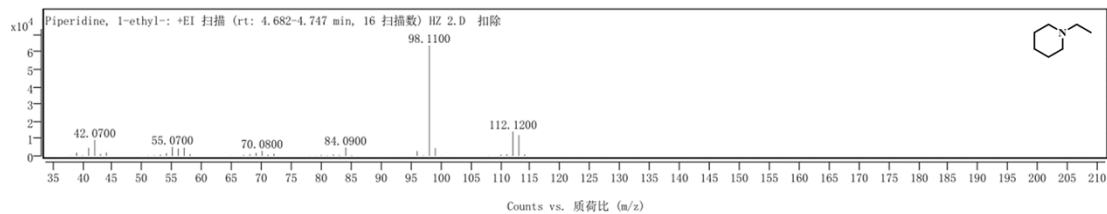

### N,N-Dimethylcyclohexanamine

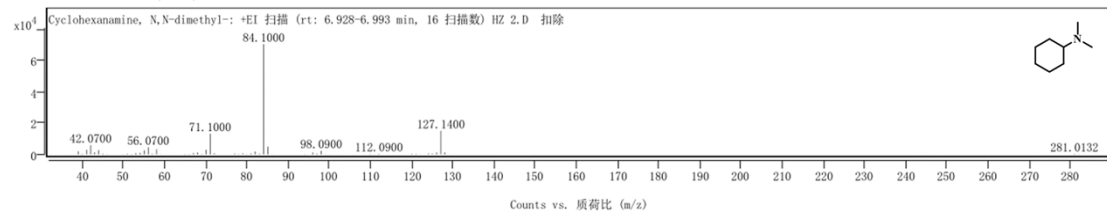

### 1,2,2,6,6-Pentamethylenepiperidine

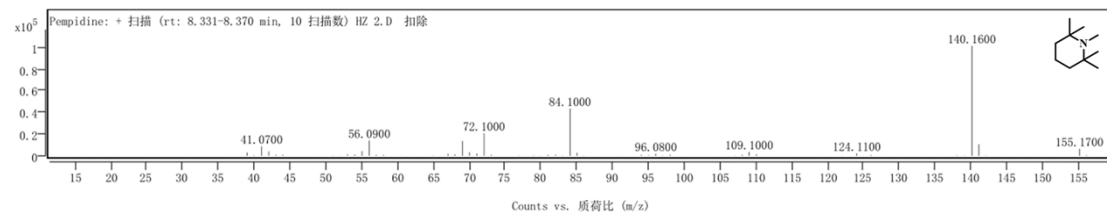

### N,N-Diethylaniline

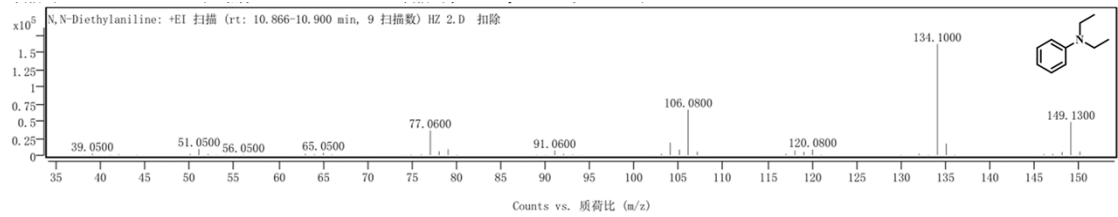

### Benzyldiisopropylamine

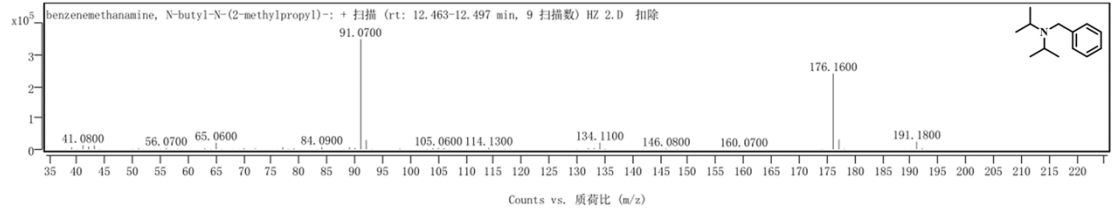

### N-isopropylethylamine

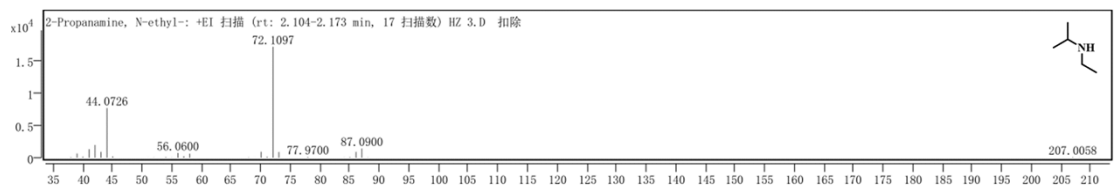

### N,N-Diisopropylmethylaniline

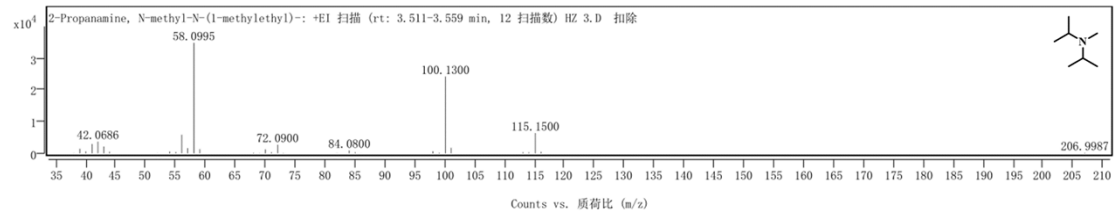

### N,N-Dimethylcyclohexanamine

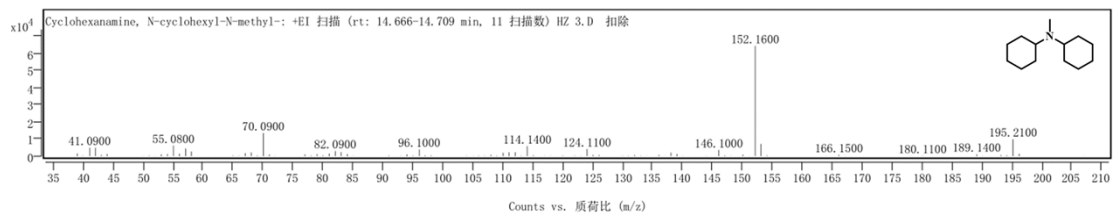

### N-Methyldiphenylamine

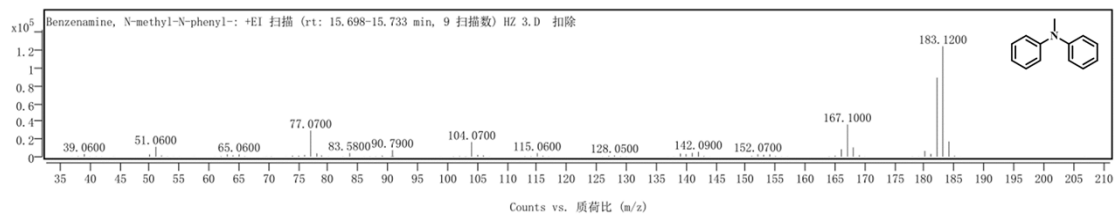

### N-benzyl-3-bromoaniline

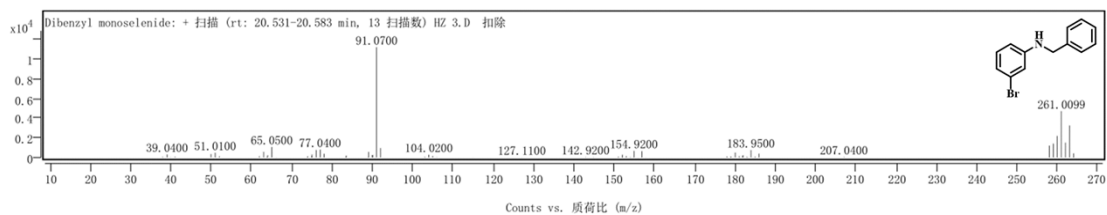

## NMR spectra of selected products

### *N,N*-Dimethylaniline

$^1\text{H}$  NMR (600 MHz, Chloroform-*d*)  $\delta$  7.28 (d,  $J = 5.4$  Hz, 2H), 6.78 (dd,  $J = 21.9, 7.8$  Hz, 3H), 2.98 (s, 6H).  $^{13}\text{C}$  NMR (151 MHz, Chloroform-*d*)  $\delta$  129.09, 112.79, 40.71.

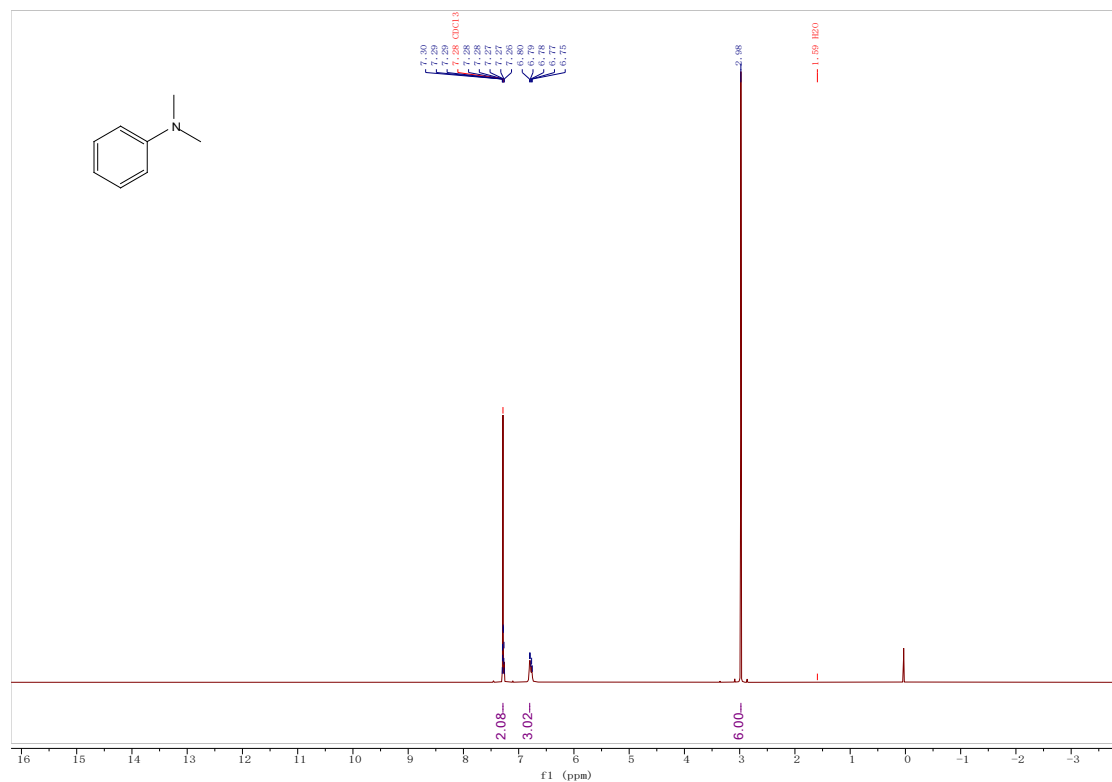

$^1\text{H}$  NMR spectra of *N,N*-Dimethylaniline





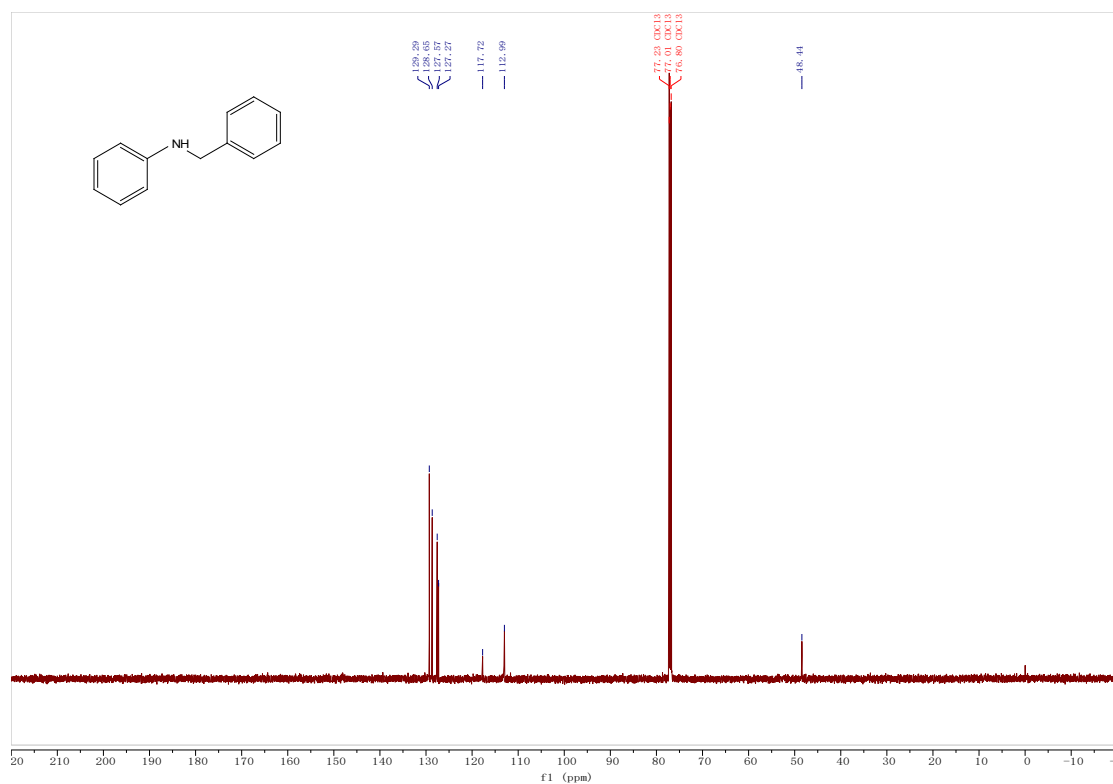

$^{13}\text{C}$  NMR spectra of N-Benzylaniline

### Dibenzylamine

$^1\text{H}$  NMR (600 MHz, Chloroform-*d*)  $\delta$  7.40 – 7.27 (m, 10H), 3.85 (d,  $J = 1.2$  Hz, 4H).  $^{13}\text{C}$  NMR (151 MHz, Chloroform-*d*)  $\delta$  140.26, 140.22, 128.42, 128.19, 126.98, 53.15, 53.13.

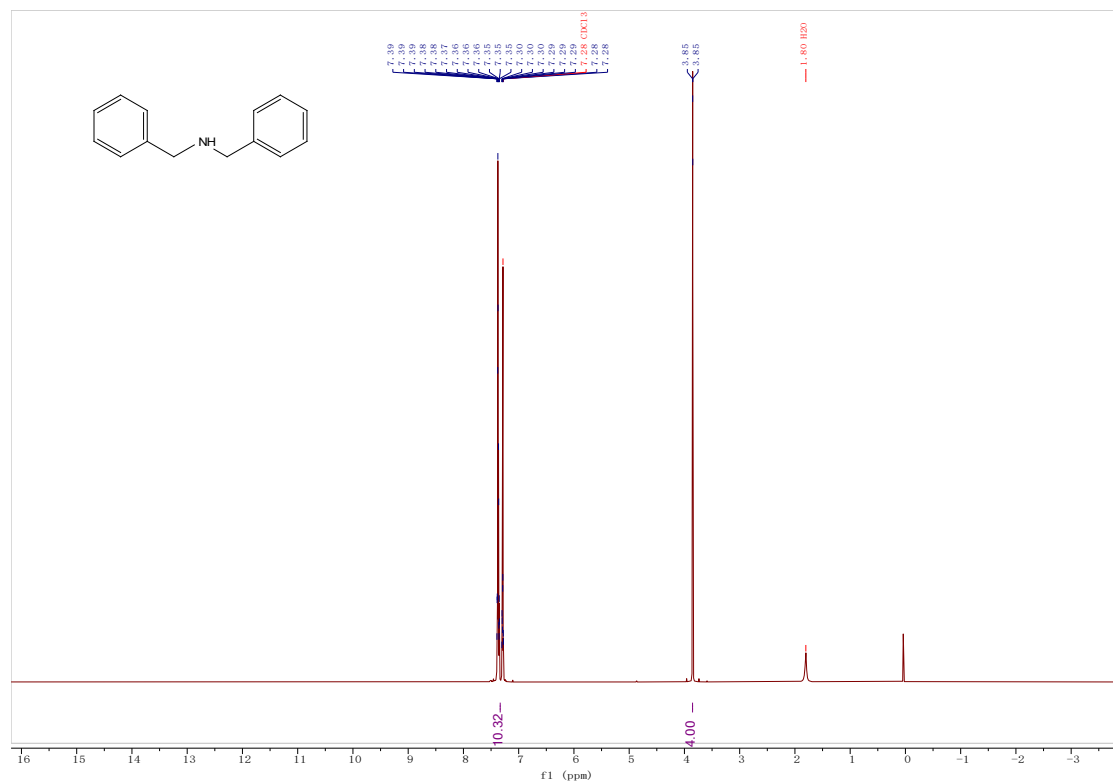

$^1\text{H}$  NMR spectra of Dibenzylamine

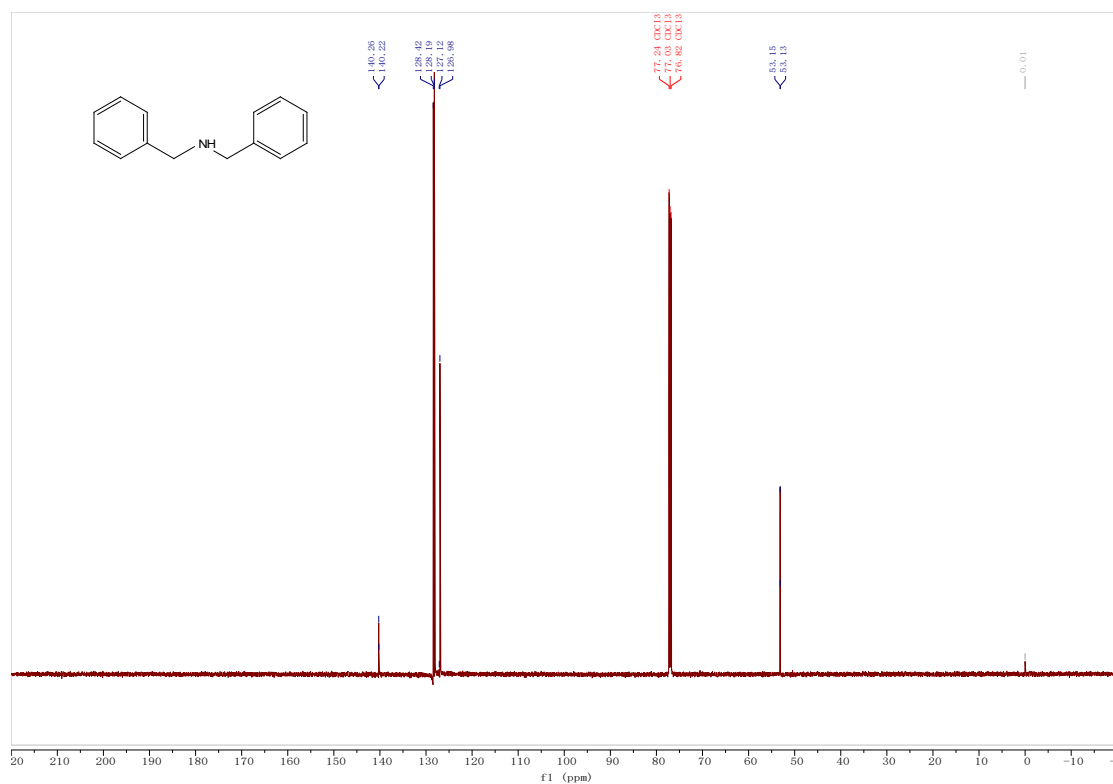

<sup>13</sup>C NMR spectra of Dibenzylamine

***N,N*-Diethylaniline**

<sup>1</sup>H NMR (600 MHz, Chloroform-*d*) δ 7.23 (t, *J* = 7.7 Hz, 2H), 6.77 – 6.55 (m, 3H), 3.38 (q, *J* = 7.0 Hz, 4H), 1.19 (t, *J* = 7.0 Hz, 6H). <sup>13</sup>C NMR (151 MHz, Chloroform-*d*) δ 147.85, 129.25, 115.37, 111.90, 44.32, 12.57.

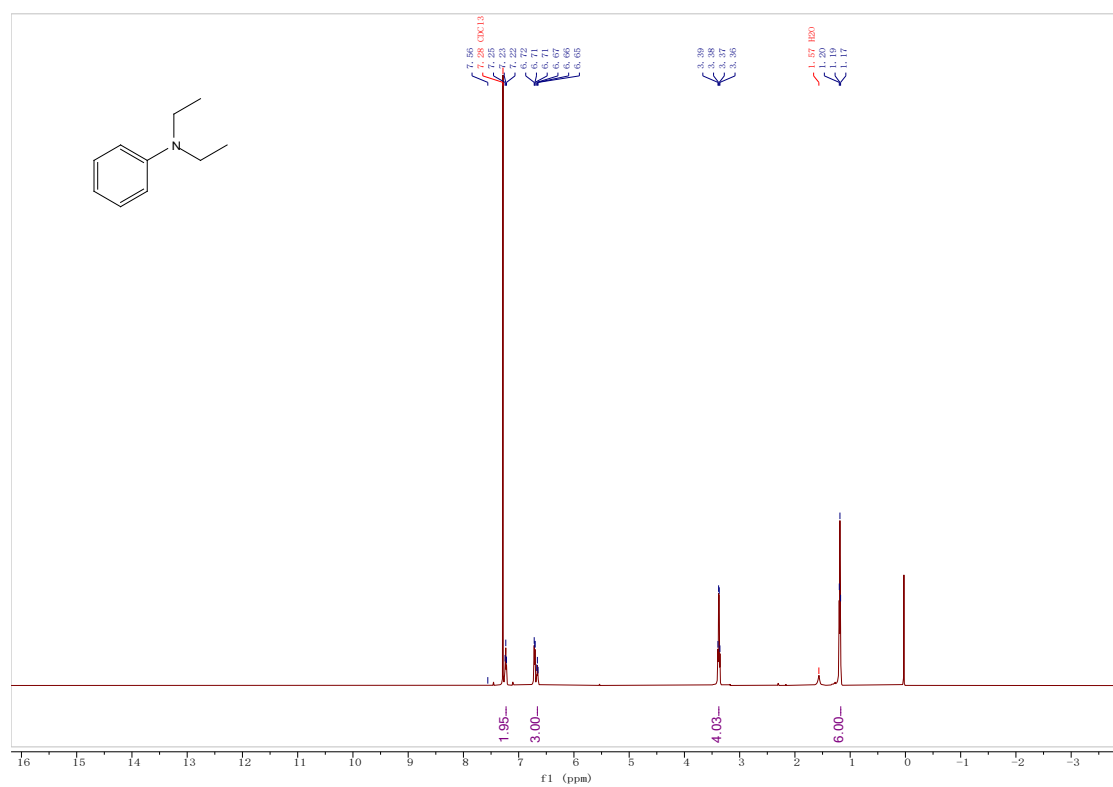

<sup>1</sup>H NMR spectra of *N,N*-Diethylaniline

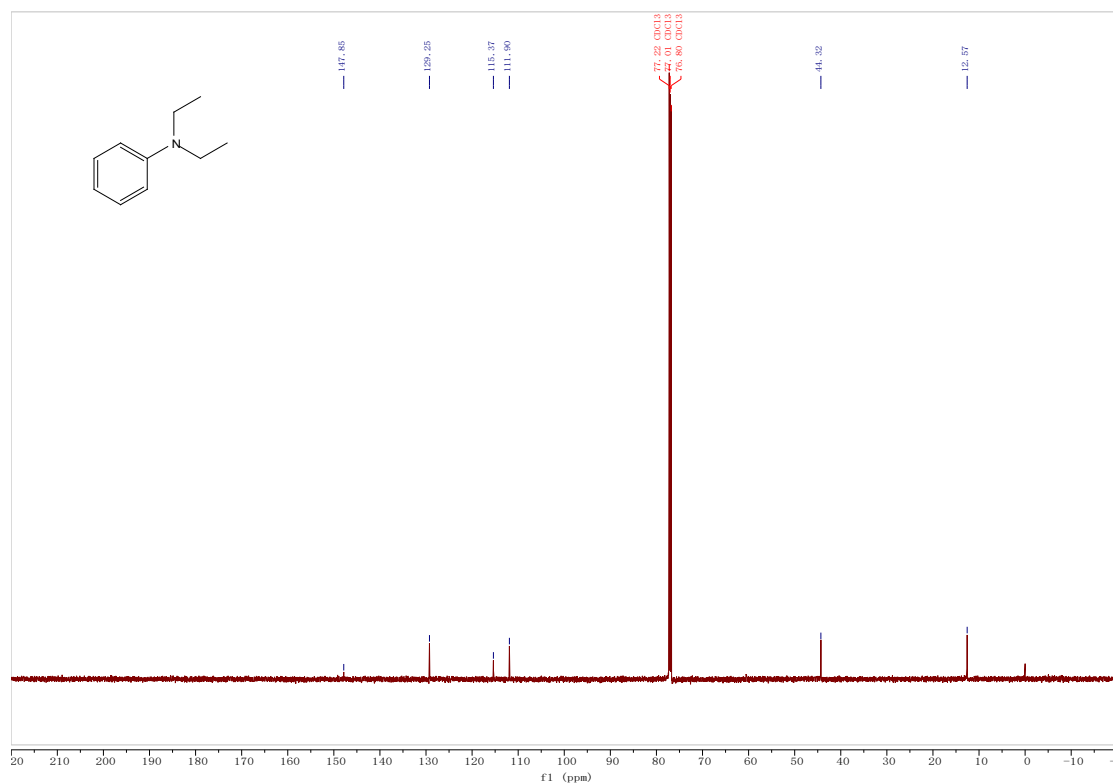

$^{13}\text{C}$  NMR spectra of N,N-Diethylaniline

**N-Benzyl-diethylamine**

$^1\text{H}$  NMR (600 MHz, Chloroform-*d*)  $\delta$  7.42 – 7.30 (m, 4H), 7.28 – 7.24 (m, 1H), 3.62 (s, 2H), 2.66 – 2.50 (m, 4H), 1.09 (t,  $J = 6.6$  Hz, 6H).  $^{13}\text{C}$  NMR (151 MHz, Chloroform-*d*)  $\delta$  129.00, 128.16, 57.46, 46.70, 11.63.



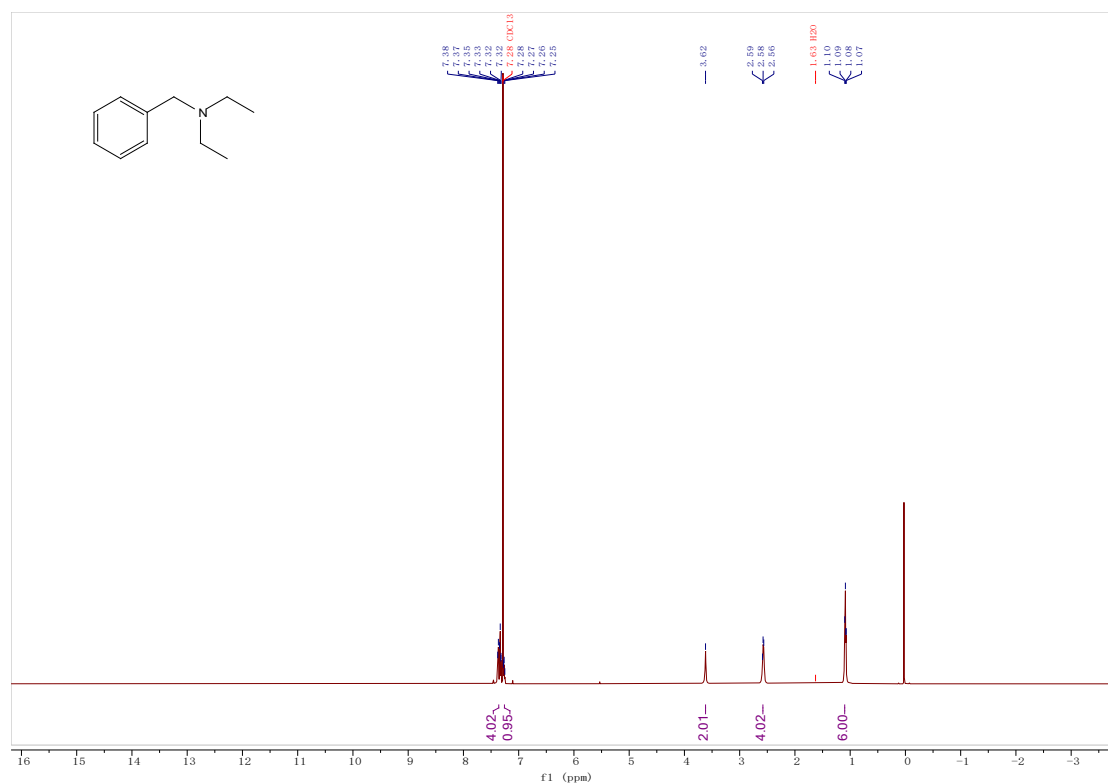

<sup>1</sup>H NMR spectra of N-Benzyl-diethylamine

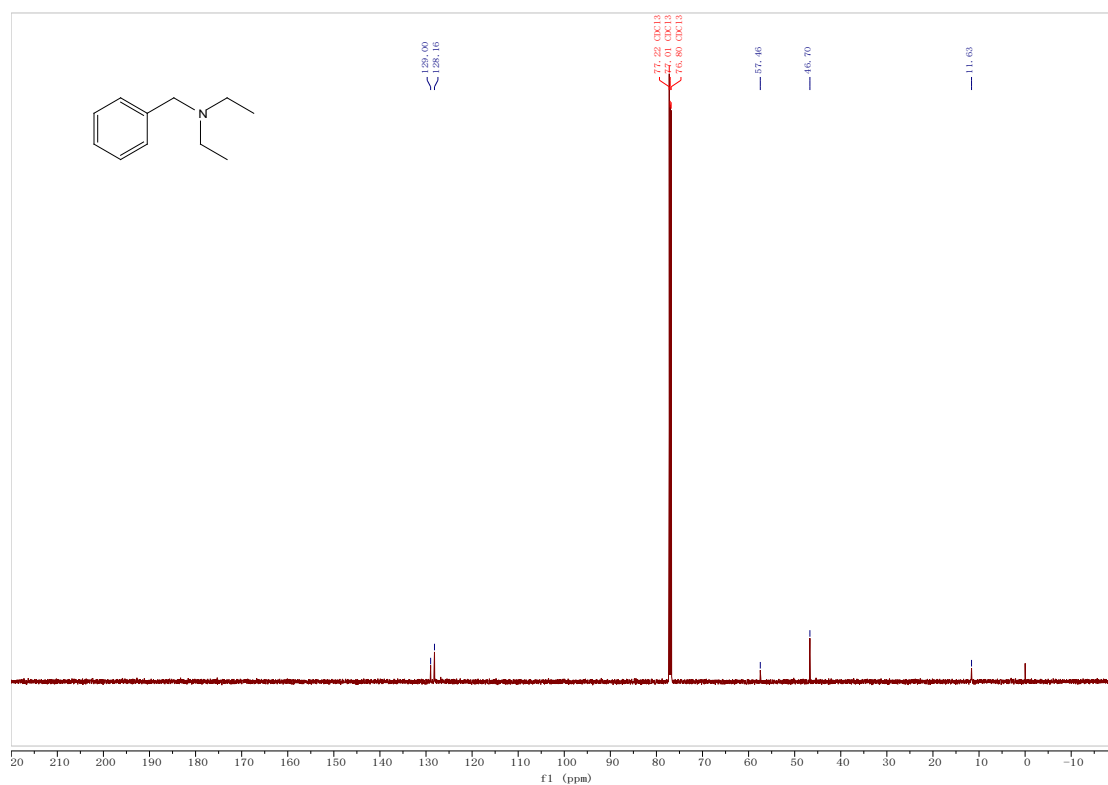

<sup>13</sup>C NMR spectra of N-Benzyl-diethylamine

**N-benzyl-3-bromoaniline**

<sup>1</sup>H NMR (600 MHz, Chloroform-*d*)  $\delta$  7.43 – 7.30 (m, 5H), 7.04 (t,  $J = 8.0$  Hz, 1H), 6.86 (dt,  $J = 7.8, 1.2$

Hz, 1H), 6.82 (t,  $J = 2.1$  Hz, 1H), 6.57 (dd,  $J = 8.2, 2.4$  Hz, 1H), 4.33 (s, 2H).  $^{13}\text{C}$  NMR (151 MHz, Chloroform- $d$ )  $\delta$  149.19, 138.59, 130.52, 128.75, 127.56, 127.54, 127.51, 127.50, 123.29, 120.61, 120.53, 115.60, 111.70, 48.27, 48.22.

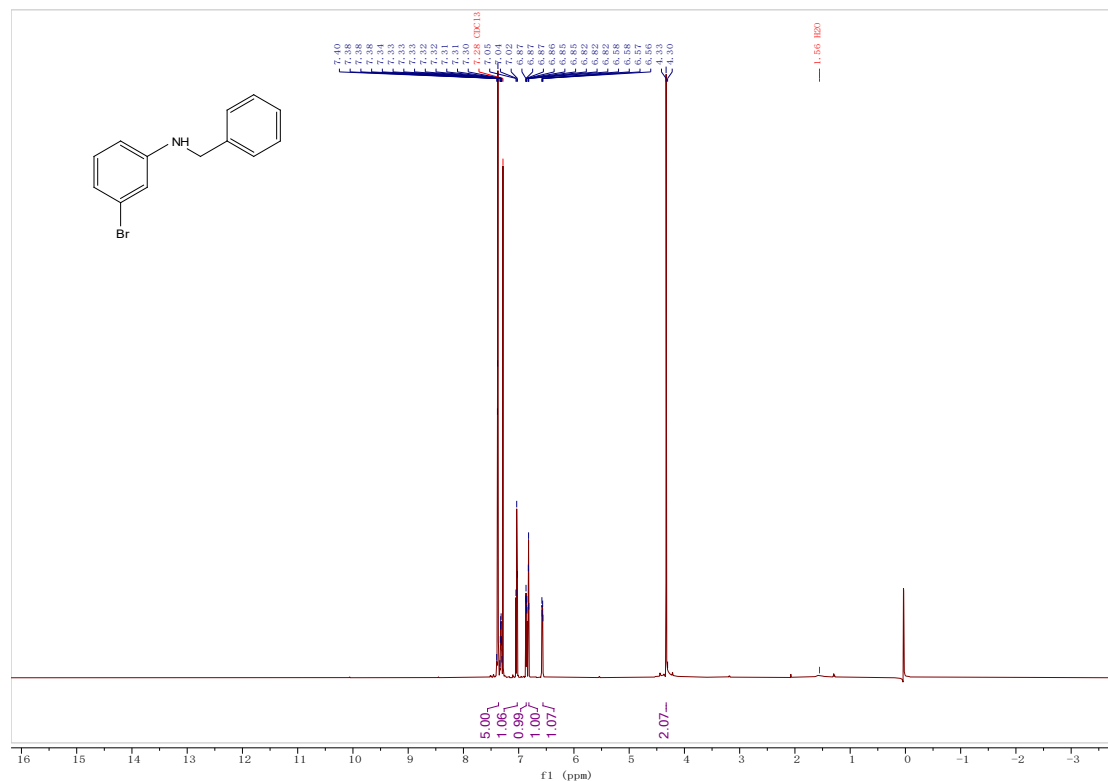

$^1\text{H}$  NMR spectra of N-benzyl-3-bromoaniline

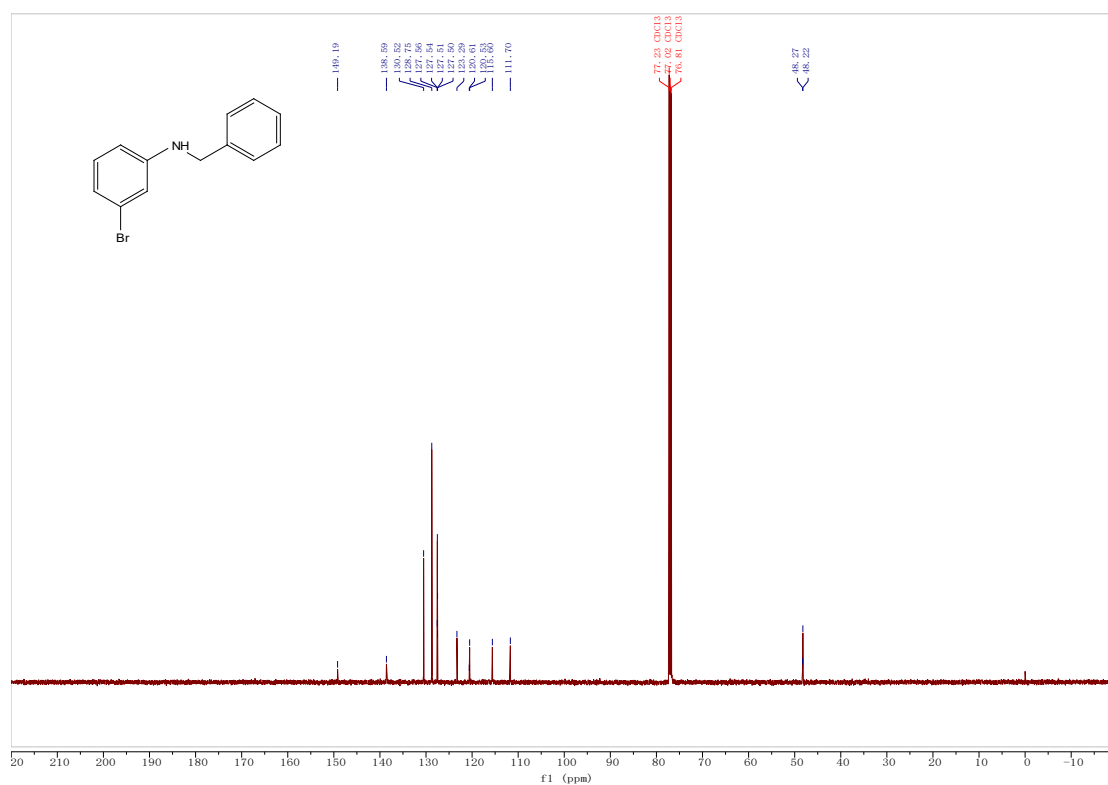

$^{13}\text{C}$  NMR spectra of N-benzyl-3-bromoaniline

### 4-chloro-*N,N*-dimethylaniline

$^1\text{H NMR}$  (600 MHz, Chloroform-*d*)  $\delta$  7.24 – 7.17 (m, 2H), 6.70 (t,  $J = 4.4$  Hz, 2H), 2.96 (d,  $J = 1.4$  Hz, 6H).  $^{13}\text{C NMR}$  (151 MHz, Chloroform-*d*)  $\delta$  128.88, 40.84.

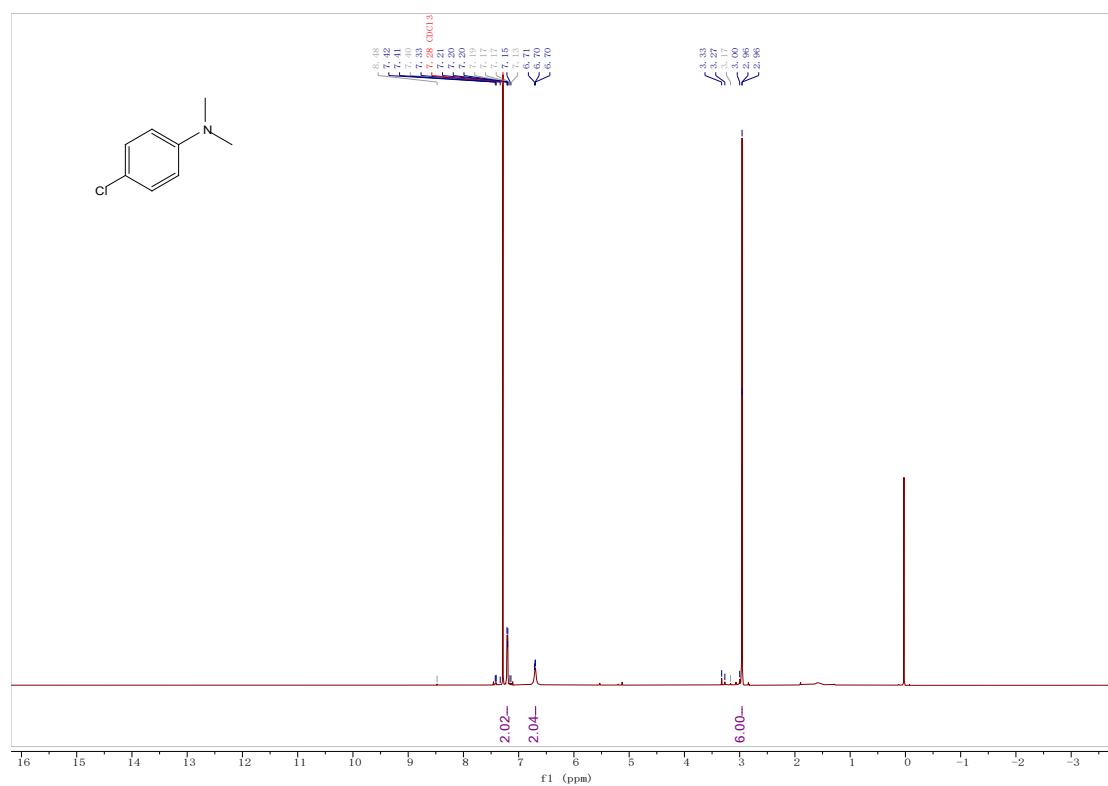

$^1\text{H NMR}$  spectra of 4-chloro-*N,N*-dimethylaniline

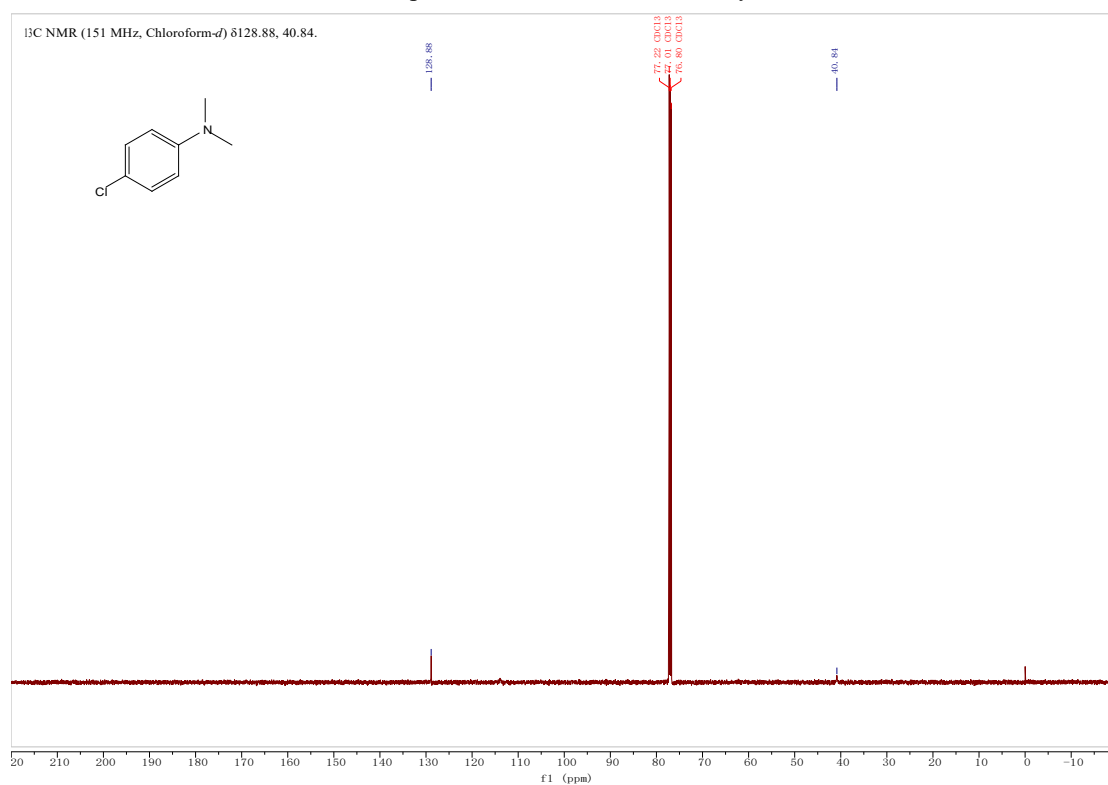

$^{13}\text{C NMR}$  spectra of 4-chloro-*N,N*-dimethylaniline

## Benzyl-diisopropylamine

$^1\text{H}$  NMR (600 MHz, Chloroform-*d*)  $\delta$  7.41 (d,  $J = 7.5$  Hz, 2H), 7.31 (t,  $J = 7.5$  Hz, 2H), 7.22 (t,  $J = 7.3$  Hz, 1H), 3.67 (s, 2H), 3.06 (dd,  $J = 12.9, 6.7$  Hz, 2H), 1.05 (d,  $J = 6.6$  Hz, 12H).  $^{13}\text{C}$  NMR (151 MHz, Chloroform-*d*)  $\delta$  143.29, 127.96, 127.89, 126.13, 48.91, 47.79, 20.76.

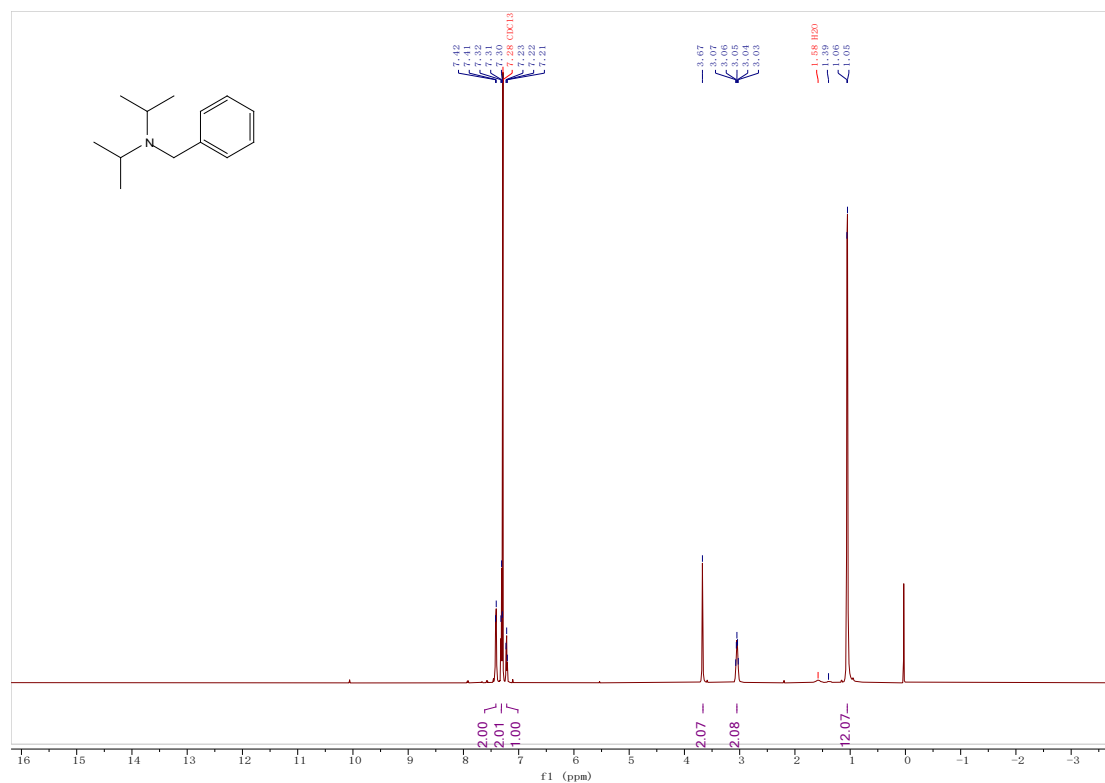

$^1\text{H}$  NMR spectra of Benzyl-diisopropylamine

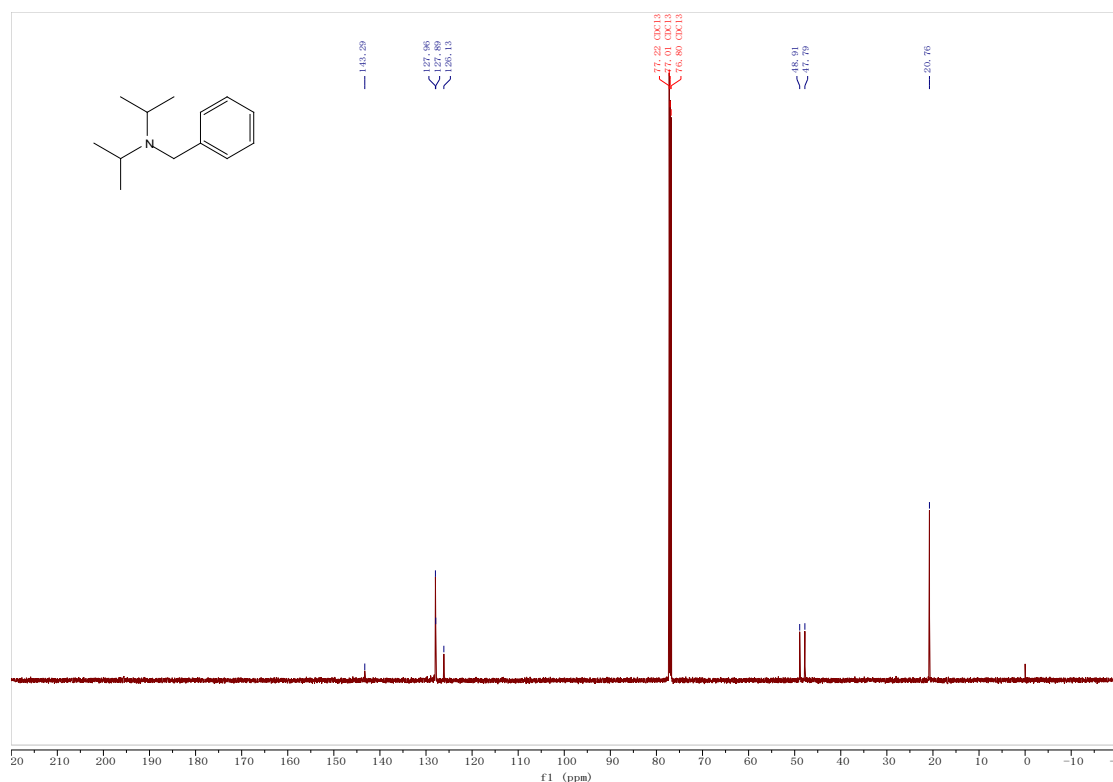

<sup>13</sup>C NMR spectra of Benzyl-diisopropylamine

### *N*-Methyldiphenylamine

<sup>1</sup>H NMR (600 MHz, Chloroform-*d*)  $\delta$  7.31 (dddt,  $J = 8.7, 7.5, 2.8, 1.6$  Hz, 4H), 7.10 – 7.03 (m, 4H), 6.99 (dddt,  $J = 9.7, 7.2, 2.5, 1.3$  Hz, 2H), 3.35 (dd,  $J = 2.8, 1.5$  Hz, 3H). <sup>13</sup>C NMR (151 MHz, Chloroform-*d*)  $\delta$  149.03, 129.20, 121.33, 120.48, 40.28.

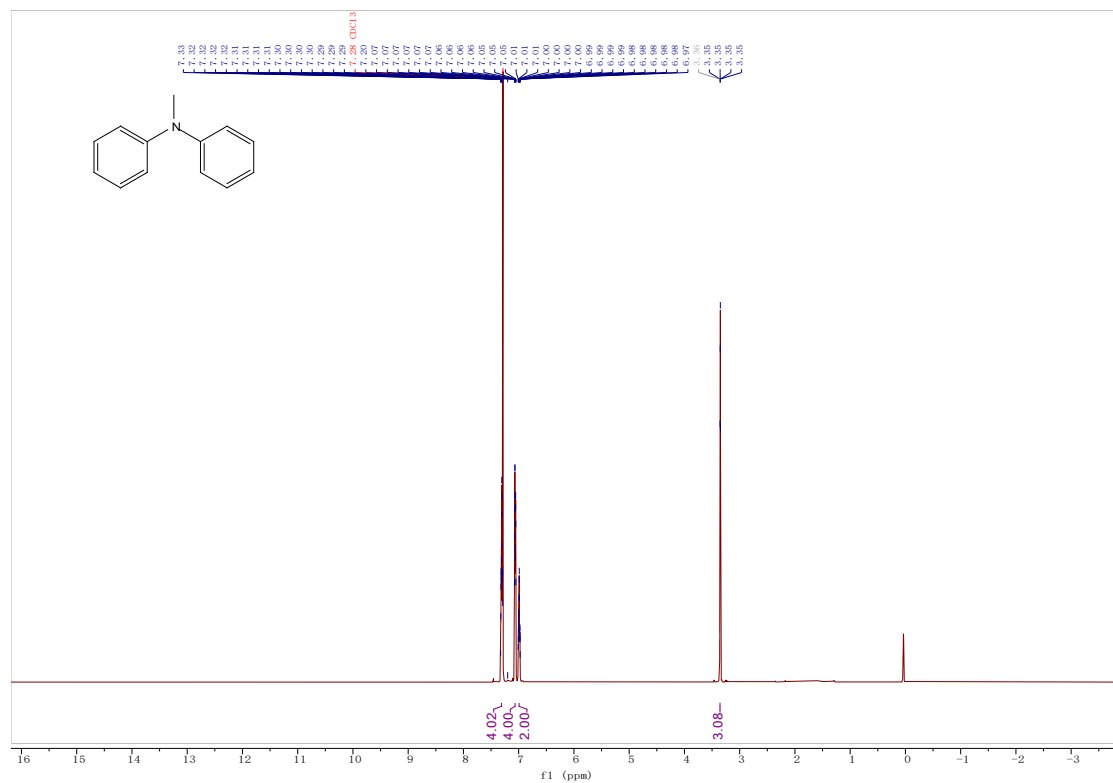

### $^1\text{H}$ NMR spectra of N-Methyldiphenylamine

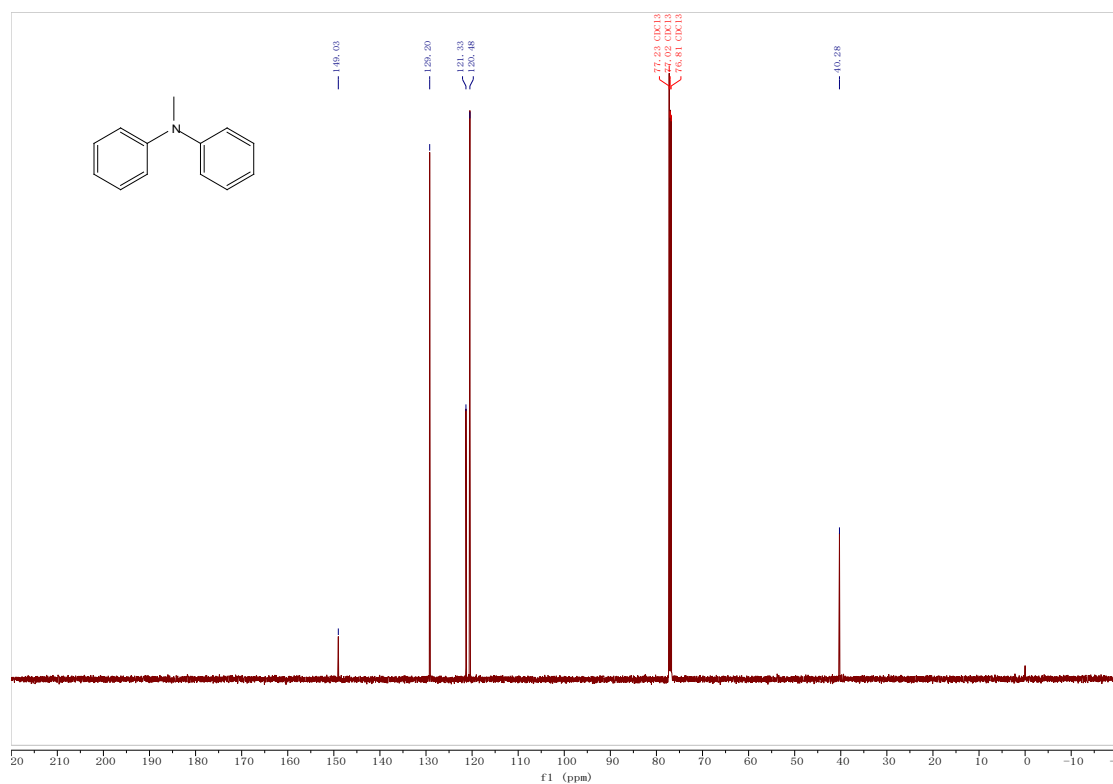

### $^{13}\text{C}$ NMR spectra of N-Methyldiphenylamine

#### **N-Benzylpropanamine**

$^1\text{H}$  NMR (600 MHz, Chloroform-*d*)  $\delta$  7.35 (d,  $J = 4.4$  Hz, 4H), 7.28 – 7.24 (m, 1H), 3.82 (s, 2H), 2.63 (t,  $J = 7.2$  Hz, 2H), 1.55 (p,  $J = 7.3$  Hz, 2H), 1.04 – 0.89 (m, 3H).  $^{13}\text{C}$  NMR (151 MHz, Chloroform-*d*)  $\delta$  140.64, 128.37, 128.11, 126.85, 54.05, 51.39, 23.21, 11.78.

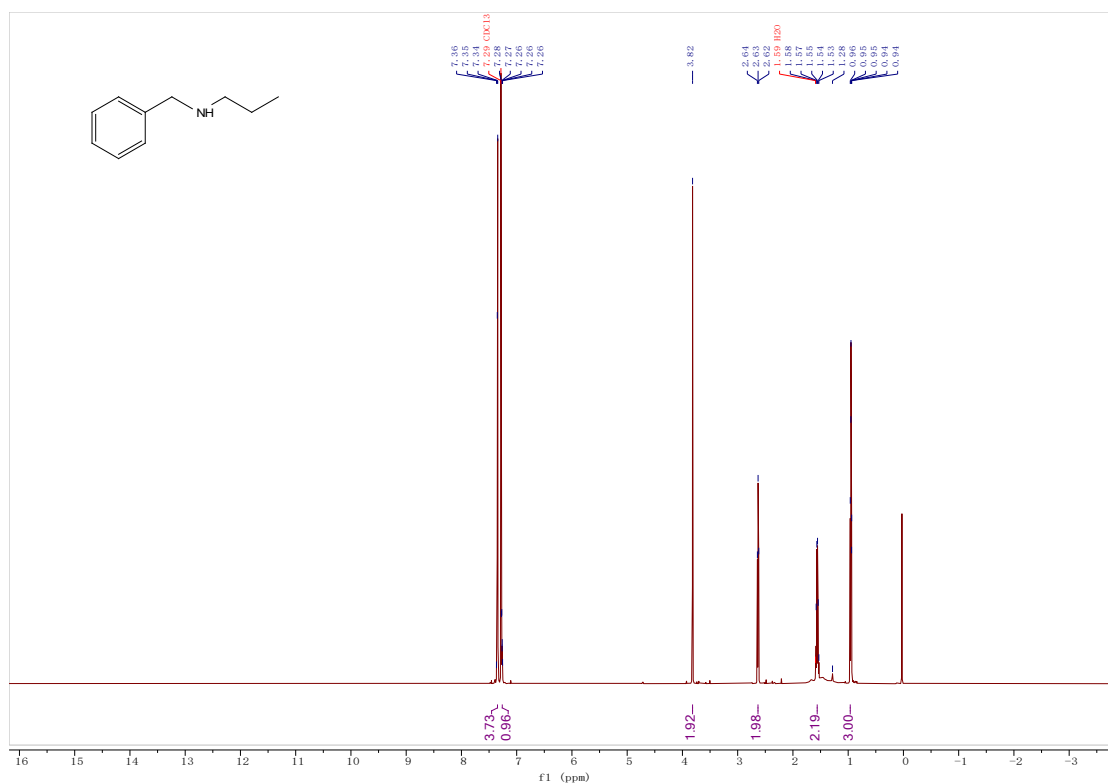

<sup>1</sup>H NMR spectra of N-Benzylpropanamine

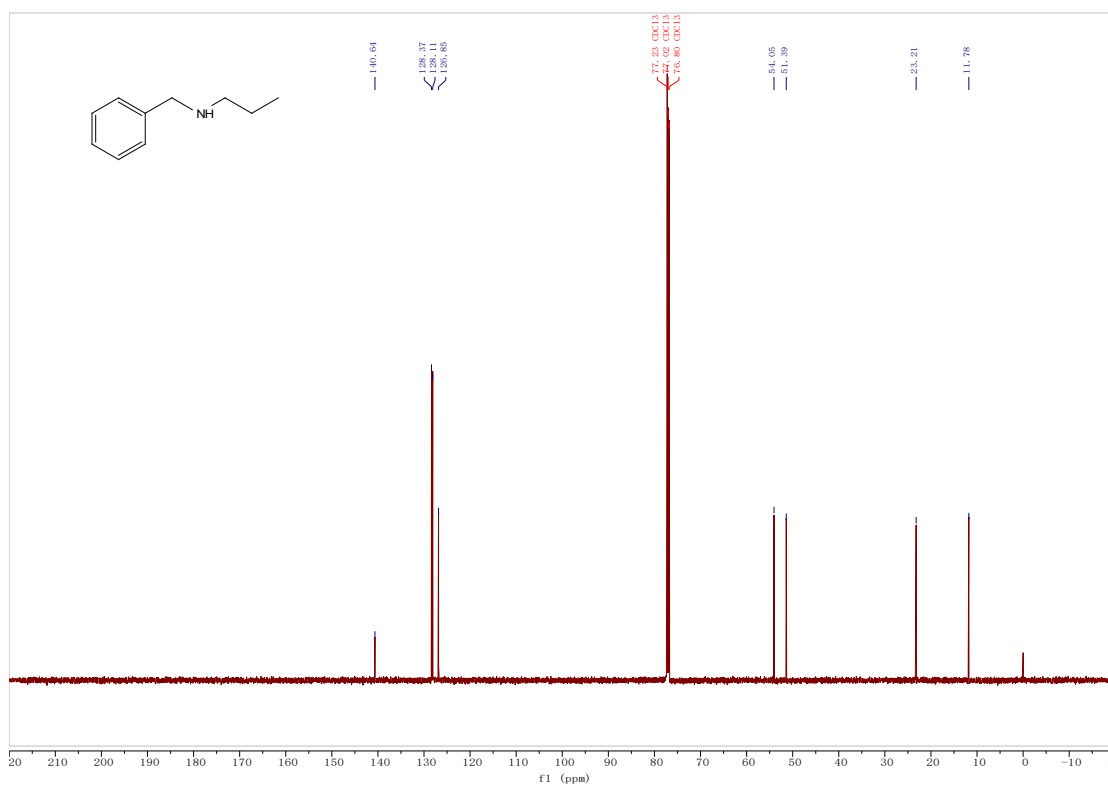

<sup>13</sup>C NMR spectra of N-Benzylpropanamine

## Computational Section

Figure S6. Stick model for Pd, Pd<sub>1</sub>Pt<sub>1</sub> and Pt clusters

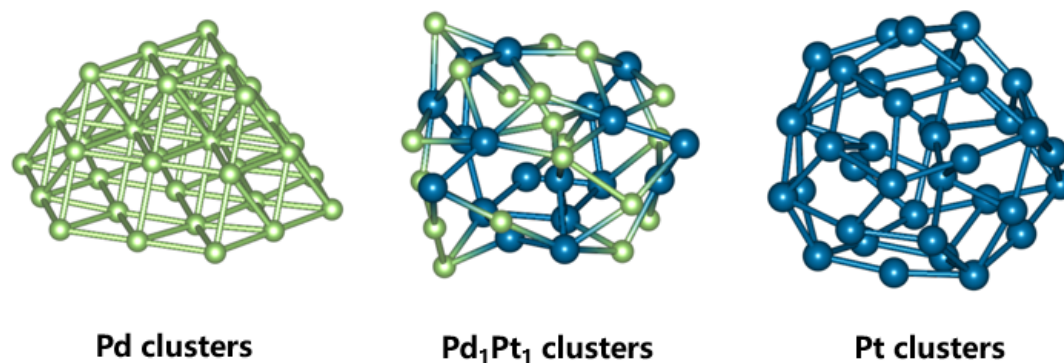

## Computational Details

The structural optimization and the frequency analysis were performed at the GFN-xTB level of the xTB package.<sup>2,3</sup> Stationary points were optimized without symmetry constraint, and their nature was confirmed by vibrational frequency analysis.<sup>4</sup> To achieve this, a Gaussian interface to the xTB code “gau\_xtb” was employed.<sup>5</sup> Analysis on the molecular orbitals was performed at the PBE0/def2-SV(P) level of theory using ORCA 4.2 package.<sup>6</sup>

## References

1. Li, X.; Kang, B.; Dong, F.; Zhang, Z.; Luo, X.; Han, L.; Huang, J.; Feng, Z.; Chen, Z.; Xu, J.; Peng, B.; Wang, Z. L., Enhanced photocatalytic degradation and H<sub>2</sub>/H<sub>2</sub>O<sub>2</sub> production performance of S-pCN/WO<sub>2.72</sub> S-scheme heterojunction with appropriate surface oxygen vacancies. *Nano Energy* **2021**, *81*, 105671.
2. Bannwarth, C.; Ehlert, S.; Grimme, S., GFN2-xTB-An Accurate and Broadly Parametrized Self-Consistent Tight-Binding Quantum Chemical Method with Multipole Electrostatics and Density-Dependent Dispersion Contributions. *J. Chem. Theory Comput.* **2019**, *15* (3), 1652-1671.
3. Grimme, S.; Bannwarth, C.; Shushkov, P., A Robust and Accurate Tight-Binding Quantum Chemical Method for Structures, Vibrational Frequencies, and Noncovalent Interactions of Large Molecular Systems Parametrized for All spd-Block Elements (Z=1-86). *J. Chem. Theory Comput.* **2017**, *13* (5), 1989-2009.



4. Hratchian, H. P.; Schlegel, H. B., Using Hessian updating to increase the efficiency of a Hessian based predictor-corrector reaction path following method. *J. Chem. Theory Comput.* **2005**, *1* (1), 61-69.
5. Tian Lu, gau\_xtb: A Gaussian interface for xtb code, [http://sobereva.com/soft/gau\\_xtb](http://sobereva.com/soft/gau_xtb).
6. Neese, F. Software Update: the ORCA Program System, Version 4.0. *WIREs Comput. Mol. Sci.* **2018**, *8*, e1327.
